# 1 **Sahul's megafauna were vulnerable to plant-community changes** 2 **due to their position in the trophic network**

3  
4 John Llewelyn<sup>1</sup> ([johnsllewelyn@gmail.com](mailto:johnsllewelyn@gmail.com)), Giovanni Strona<sup>2</sup> ([goblinshrimp@gmail.com](mailto:goblinshrimp@gmail.com)),  
5 Matthew C. McDowell<sup>3</sup> ([matthew.mcdowell@utas.edu.au](mailto:matthew.mcdowell@utas.edu.au)), Christopher N. Johnson<sup>4</sup>  
6 ([c.n.johnson@utas.edu.au](mailto:c.n.johnson@utas.edu.au)), Katharina J. Peters<sup>1</sup> ([katharina.peters@flinders.edu.au](mailto:katharina.peters@flinders.edu.au)), Daniel B.  
7 Stouffer<sup>5</sup> ([Daniel.stouffer@canterbury.ac.nz](mailto:Daniel.stouffer@canterbury.ac.nz)), Sara N. de Visser<sup>6</sup> ([sndevisser@hotmail.com](mailto:sndevisser@hotmail.com)),  
8 Frédéric Saltré<sup>1</sup> ([frederik.saltre@flinders.edu.au](mailto:frederik.saltre@flinders.edu.au)), Corey J. A. Bradshaw<sup>1</sup>  
9 ([Corey.Bradshaw@flinders.edu.au](mailto:Corey.Bradshaw@flinders.edu.au))

10  
11 <sup>1</sup>Global Ecology, College of Science and Engineering and ARC Centre of Excellence for Australian  
12 Biodiversity and Heritage, Flinders University, GPO Box 2100, Adelaide, South Australia 5001, Australia

13 <sup>2</sup>Research Centre for Ecological Change, University of Helsinki, Viikinkaari 1, Biocentre 3, 00790, Helsinki,  
14 Finland

15 <sup>3</sup>Dynamics of Eco-Evolutionary Pattern and ARC Centre of Excellence for Australian Biodiversity and  
16 Heritage, University of Tasmania, Tasmania 7001, Australia

17 <sup>4</sup>School of Natural Sciences and Australian Research Council Centre of Excellence for Australian Biodiversity  
18 and Heritage, University of Tasmania, Private Bag 55, Hobart, Tasmania 7001, Australia

19 <sup>5</sup>Centre for Integrative Ecology, School of Biological Sciences, University of Canterbury, Christchurch, New  
20 Zealand

21 <sup>6</sup>Community and Conservation Ecology, Centre for Ecological and Evolutionary Studies, University of  
22 Groningen, PO Box 11103, 9700 Groningen, The Netherlands

23

24 **Short running title:** Trophic cascades and megafauna

25

26 **Key words:** ecological network, coextinction, biotic interactions, extinction event, Late  
27 Pleistocene, food web

28

## 29 **Author contributions**

30 Project conceptualization by J.L., G.S., C.J.A.B., and F.S. Data curation by J.L., G.S., K.J.P.,  
31 C.N.J., M.C.M., and S.N.d-V. Investigation and formal analysis by J.L., G.S., and C.J.A.B.  
32 Methodology by J.L., G.S., C.J.A.B., and D.B.S. Original draft preparation by J.L., G.S.,  
33 C.J.A.B., and F.S. All authors contributed to reviewing and editing the draft.

34

## 35 **Data and code accessibility**

36 All relevant data and code are available at [Github.com/JohnLlewelyn/Inferring-networks-](https://github.com/JohnLlewelyn/Inferring-networks-and-modelling-trophic-cascades)  
37 [and-modelling-trophic-cascades](https://github.com/JohnLlewelyn/Inferring-networks-and-modelling-trophic-cascades) (DOI: 10.5281/zenodo.3756224)

38

## 39 **Corresponding author**

40 John Llewelyn

41 Email: [johnsllewelyn@gmail.com](mailto:johnsllewelyn@gmail.com)

42 Phone: +61 429 506 956

43 Fax: +8 8201 3399

44 Address: Global Ecology Lab, College of Science & Engineering, Flinders University

45

46

47

## 48 **Abstract**

49 Extinctions stemming from environmental change often trigger trophic cascades and  
50 coextinctions. However, it remains unclear whether trophic cascades were a large contributor  
51 to the megafauna extinctions that swept across several continents in the Late Pleistocene. The  
52 pathways to megafauna extinctions are particularly unclear for Sahul (landmass comprising  
53 Australia and New Guinea), where extinctions happened earlier than on other continents. We  
54 investigated the role of bottom-up trophic cascades in Late Pleistocene Sahul by constructing  
55 pre-extinction (~ 80 ka) trophic network models of the vertebrate community of Naracoorte,  
56 south-eastern Australia. These models allowed us to predict vertebrate species' vulnerability  
57 to cascading extinctions based on their position in the network. We tested whether the  
58 observed extinctions could be explained by bottom-up cascades, or if they should be  
59 attributed to other external causes. Species that disappeared from the community were more  
60 vulnerable, overall, to bottom-up cascades than were species that survived. The position of  
61 extinct species in the network – having few or no predators – also suggests they might have  
62 been particularly vulnerable to a new predator. These results provide quantitative evidence  
63 that trophic cascades and naivety to predators could have contributed to the megafauna  
64 extinction event in Sahul.

## 66 **Introduction**

67 Of all the extinctions that have ever occurred on Earth, many — potentially most — have  
68 been coextinctions [1]. In some cases, these coextinctions involved host-specific parasites  
69 that were doomed by the extinction of their host species, or flowering plants imperilled by the  
70 extinction of their pollinators [2]. Coextinctions have also been mediated through trophic  
71 interactions between herbivores and vegetation, and between predators and their prey [3,4].  
72 Therefore, if we are to understand past extinction events and predict future extinctions, we  
73 need to be able to infer coextinction cascades accurately.

74 Changes in the primary producer component of a community can trigger bottom-up  
75 cascades and profoundly alter ecological communities [5]. However, it is unclear which  
76 species are most vulnerable to bottom-up cascades. On the one hand, it has been argued that  
77 top predators and species from high trophic levels are particularly sensitive to food-web  
78 perturbations and reductions in habitat area/primary productivity [6–9]. However, others have  
79 concluded that changes in the diversity of primary producers or nutrient content most  
80 strongly affect herbivores, and the cascading effects on higher trophic levels are dampened by

81 trophic distance [10–13]. Similarly, extinction-risk assessments by the International Union  
82 for Conservation of Nature (IUCN) and recorded recent extinctions suggest that herbivorous  
83 terrestrial vertebrates are particularly vulnerable to extinction [14], a pattern that might partly  
84 be explained by the sensitivity of lower trophic levels to bottom-up cascades. The uncertainty  
85 regarding how vulnerability to bottom-up cascades varies with species traits (such as trophic  
86 level) has limited our ability to assess the importance of bottom-up cascades in past  
87 extinction events, and to predict how these cascades might unfold in the future.

88 Identifying the vulnerability of species to bottom-up (or top-down) coextinction cascades  
89 relies heavily on understanding species interactions within an ecological community. To this  
90 end, ecological network modelling is an invaluable tool for representing ecological  
91 communities from the perspectives of species interactions and for studying the consequences  
92 of changes in these interactions [15]. In ecological network models, organismal groups (e.g.,  
93 species, age groups, populations, or individuals) are represented by nodes, and interactions —  
94 which can be weighted or unweighted — are represented by links (edges). The interaction  
95 type most frequently used to build ecological network models are trophic interactions (i.e.,  
96 food webs). For contemporary communities, there is a growing number of studies that use  
97 detailed information on species interactions to build network models and to study trophic  
98 cascades [16–18]. Unfortunately, similar approaches are challenging to apply to palaeo-  
99 communities because of the lack of data on ancient trophic interactions. However, by  
100 combining contemporary and palaeo-data to infer trophic interactions, this limitation can be  
101 overcome and network models of palaeo-communities can be constructed [19,20]. For  
102 example, Pires et al. (2015) used this approach to model Late Pleistocene mammal  
103 communities in the Americas, concluding that (1) pre-existing American mammal networks  
104 were not especially unstable (i.e., they were similar to modern networks in Africa in terms of  
105 population densities re-establishing after simulated perturbations), and (2) the arrival of  
106 humans destabilized the networks because this new predator increased network connectance  
107 (i.e., the proportion of potential links that are realized). Investigations of paleo mass  
108 extinctions are fortified through the use of network modelling, as these methods provide  
109 insights into the causes and consequences of extinction events. Such events can also be used  
110 as a means of validating modelling methods because the outcomes (i.e., extinctions) are  
111 known. Despite these opportunities, the application of network modelling to investigate  
112 palaeo-extinction events remains under-utilised.

113 Megafauna (animals > 44 kg) extinctions swept across several continents during the Late  
114 Pleistocene (126,000 – 12,000 years ago), with the highest proportions of genera lost from

115 Sahul (landmass including Australia and New Guinea) and the Americas [21,22]. While the  
116 causes of these extinctions are still debated, most evidence points toward the arrival of  
117 anatomically modern humans and/or climate change [23–25]. Irrespective of the root causes,  
118 large extinction events such as these always involve both primary and secondary (or co-)  
119 extinctions [3]. Indeed, it has been argued that the loss of prey species led to large predators  
120 going extinct in the Late Pleistocene [26,27]. Although the arrival of modern humans and/or  
121 climate change have been identified as the most likely ultimate causes of megafauna  
122 extinctions in the Late Pleistocene, vegetation change associated with human arrival and/or  
123 climate change has been identified as a pathway through which these ultimate causes could  
124 have triggered extinctions (i.e., via bottom-up trophic cascades) [28–31].

125 The Late Pleistocene megafauna assemblage of Sahul was distinct from that of other  
126 continents in that all the large mammals were marsupials or monotremes [32]. Giant reptiles  
127 and birds were also a prominent component of the continent’s megafauna [33]. While Sahul’s  
128 megafauna included many species over the standard body-mass threshold of 44 kg, the term  
129 ‘megafauna’ is often extended to include species with a body mass above that of their  
130 surviving relatives [32] — a definition we have adopted here. Identifying the pathways by  
131 which Sahul’s unique megafauna were lost is challenging because their extinctions happened  
132 much earlier in Sahul than elsewhere [34]. To characterize such ancient extinction events, a  
133 sufficient number of dated fossilized remains is necessary [35]. The most detailed and well-  
134 studied fossil record spanning the megafauna extinction event in Sahul comes from the  
135 Naracoorte region in south-eastern Australia (Figure 1). This fossil record offers an  
136 exceptional picture of the species living in the region over the past 500,000 years, including  
137 the ecological community at the time of the main megafauna extinction event that occurred  
138 approximately 44,000 years ago in Naracoorte [25]. Thus, the Naracoorte fossil record is the  
139 best platform available from which to model the ecological and environmental processes  
140 potentially involved in megafauna extinctions in Sahul.

141 We assessed how vulnerability to bottom-up cascades varies with network-position  
142 attributes and whether bottom-up coextinction cascades stemming from the loss of basal  
143 resources (i.e., primary producers/plants) could have played a role in the megafauna  
144 extinctions of Sahul. First, we built small, synthetic networks (3 to 20 nodes) varying in  
145 topology (i.e., structure of connections), and calculated each node’s coextinction vulnerability  
146 using two methods: (i) simulation, and (ii) Bayesian networks. This allowed us to test the  
147 general influence of trophic level, diet breadth, and number of connected basal resources on  
148 vulnerability to bottom-up coextinction cascades.

149 Next, we used Naracoorte as a model system to assess whether bottom-up coextinction  
150 cascades could explain which species went extinct during the Late Pleistocene event. We  
151 constructed an entire terrestrial, palaeo-vertebrate assemblage (including all terrestrial  
152 vertebrate classes), and combined this assemblage with palaeo and contemporary data to infer  
153 trophic interactions and build network models (Figure 2). These network models consisted of  
154 nodes (species) with directed, unweighted links. We then computed each species'  
155 vulnerability to coextinction via bottom-up cascades using the simulation method we  
156 validated with the synthetic networks, and we compared the coextinction vulnerabilities (and  
157 the traits influencing them) between extinct and extant (surviving into the Holocene) species.  
158 In addition to vulnerability to bottom-up coextinction cascades, we also tested for differences  
159 in the network positions of extant and extinct species to determine if relative position could  
160 have made extinct species more vulnerable in other ways (e.g., more vulnerable to a new  
161 predator). By incorporating interactions involving all vertebrate species, we adopted a holistic  
162 approach to studying megafauna extinctions of the Late Pleistocene.

163 We found that vulnerability to bottom-up cascades decreases with increasing trophic  
164 level, diet breadth, and basal connections, and that extinct species were more vulnerable to  
165 bottom-up coextinction cascades than were extant species. This suggests that bottom-up  
166 trophic cascades possibly contributed to the megafauna extinction event in Sahul. Our results  
167 also indicate that extinct species had fewer predators than did surviving species, suggesting  
168 that extinct species might have been particularly sensitive to the arrival of the new predator  
169 *Homo sapiens*.

170

## 171 **Methods**

172 We aimed to: (1) identify how vulnerability to bottom-up cascades varies with trophic level,  
173 diet breadth, and basal connections using synthetic networks, and (2) develop and interrogate  
174 ecological network models representing the Naracoorte ecosystem prior to the main  
175 megafauna-extinction pulse and the arrival of humans in the region (~ 44,000 years ago) [25].  
176 Below, we describe how we generated the synthetic networks, measured node vulnerability to  
177 bottom-up cascades, built ecologically realistic models of the Naracoorte network, and tested  
178 whether bottom-up coextinction cascades could explain which species were lost from the  
179 Naracoorte network (see Supplementary Figure S1 for a flowchart of methods for the  
180 construction and analysis of the Naracoorte network).

181

182 *Synthetic networks*

183 We randomly generated 196 ‘synthetic’ networks that differed in topology. The networks  
184 varied in size (number of nodes: 3 to 20), number of links (2 to 92), and connectance (0.07 to  
185 0.33). Within these networks, nodes varied in trophic level (1 to 4), number of ‘in’ links (1 to  
186 8), and the number of basal nodes to which non-basal nodes were directly or indirectly  
187 connected through ‘in’ links (1 to 8). We generated these networks to test how a node’s  
188 vulnerability to the removal/extinction of basal nodes (analogous to plants/primary  
189 producers) varied depending on the node’s trophic level, diet breadth (number of ‘in’ links),  
190 and the number of basal resources to which it was connected.

191

192 *Coextinction vulnerability in synthetic networks*

193 We inferred vulnerability of nodes to bottom-up cascades via: (i) simulations, and (ii) a  
194 Bayesian network method [36]. We applied two different approaches because there is  
195 uncertainty regarding the best methods to infer vulnerability to bottom-up cascades [3], so  
196 consensus using both approaches would provide more robust results than relying on only one.  
197 In the simulation method, primary extinctions occur by randomly removing basal nodes from  
198 the network, after which coextinctions are simulated by removing nodes that had lost all their  
199 ‘in’ links. Based on 1000 iterations of each network, we calculated the average coextinction  
200 vulnerability of each node as the proportion of total basal resources remaining when  
201 coextinction occurred. Applying the Bayesian-network method to the same networks [36],  
202 baseline extinction probabilities are assigned to each node and then each node’s accumulative  
203 extinction vulnerability is calculated using the network structure (taking into account each  
204 node’s dependencies on other nodes). In our case, we adjusted baseline probabilities of  
205 extinction so that primary extinctions were restricted to basal nodes.

206

207 *Analysis of synthetic networks*

208 We fit mixed-effects models to the results from the simulation and Bayesian network  
209 approaches to assess if the two methods yielded similar results in terms of the effects of  
210 trophic level, diet breadth, and basal connections on vulnerability to bottom-up coextinction  
211 cascades. Prior to fitting, we scaled the independent variables so that the units of the  
212 regression coefficients were the same for all variables. The full/global mixed-effects model  
213 had coextinction vulnerability as the dependent variable (response), trophic level, diet  
214 breadth, number of connected basal nodes, and the interactions between these traits as  
215 independent variables (fixed effects), and network identity as a random effect. We compared

216 support for the full models with every combination of nested/reduced model using Akaike's  
217 information criterion weights ( $wAIC_c$ ). If including trophic level, diet breadth, and number of  
218 basal connections resulted in models with higher  $wAIC_c$ , this suggests these variables affect  
219 vulnerability. We calculated model-averaged (via  $wAIC_c$ ) coefficients for the independent  
220 variables to identify how each variable influenced vulnerability. We also extracted marginal  
221  $R^2$  from three mixed effects models that had either trophic level, diet breadth, or basal  
222 connections as the only independent variable to estimate how much variation in vulnerability  
223 each of these variables explained.

224

### 225 *Naracoorte study region*

226 The World Heritage-listed (from 1994) Naracoorte Caves in south-eastern South Australia  
227 (37° 02' 24" S, 140° 48' 00" E) encompass a series of limestone caves that opened and closed  
228 to the surface at different locations, and at different times, over the last 500,000 years [37].  
229 These openings acted as natural pitfall traps, capturing snapshots of Naracoorte's biodiversity  
230 at different periods from at least 500,000 years ago to the present. In addition to the fossils of  
231 the many animals that fell into these natural traps, there are remains of species that lived in  
232 the caves, such as owls and bats, and their prey [38]. Consequently, the Naracoorte Caves  
233 provide an ideal platform from which to build palaeo-ecological network models to gain  
234 insight into how these long-lost ecosystems functioned and changed over time.

235

### 236 *Species data*

237 To build a species assemblage list (i.e., to identify the nodes to include in the network  
238 models), we used two data sources: *FosSahul* 2.0 [35,39] and the Atlas of Living Australia.  
239 *FosSahul* 2.0 is a database of dated fossil records from Sahul, including an automated  
240 quality-rating method for date reliability [40]. We extracted and vetted records from the  
241 Naracoorte region (defined as the region between 35° 32' 48" S and 38° 6' 50" S, and  
242 between 139° 10' 42" E and 141° 0' 21" E) from *FosSahul* 2.0 that had high- or intermediate-  
243 quality dates (A\*, A or B) [35], and whose age was younger than 200,000 years before  
244 present. We chose this cut-off age to provide a large enough period to include dated fossils  
245 from all/most megafauna species that lived in the region immediately prior to the main  
246 extinction event; if we had made the period too narrow, few megafauna species would have  
247 been captured despite their likely presence in the region at the time. Fossil records suffer  
248 from taphonomic biases (biases in the accumulation and preservation of different organisms),  
249 and, consequently, some species that were present in Late Pleistocene Naracoorte are unlikely

250 to be represented in the fossil record. Furthermore, there are biases for studying and dating  
251 particular groups of species due to academic and amateur interests [41]. These biases, along  
252 with the fact that *FosSahul* was primarily designed to document megafauna remains rather  
253 than smaller species, means that *FosSahul 2.0* does not include all vertebrate species present  
254 in Late Pleistocene Naracoorte. To account for this gap in the species list, we supplemented  
255 *FosSahul 2.0* data with contemporary and historical species records from the Naracoorte  
256 Coastal Plains bioregion from the Atlas of Living Australia online repository (ala.org.au;  
257 accessed 3 January 2019). The Atlas of Living Australia has detailed species records of  
258 vertebrates from this bioregion, and so it captures most of the diversity of extant and recently  
259 extinct vertebrate species. We extracted data pertaining to all terrestrial vertebrates from the  
260 region, and removed species that were introduced since European arrival, as well as vagrants  
261 and erroneous records (species well-outside their normal distribution and not present in the  
262 fossil record), and strictly coastal species such as marine birds that do not use inland  
263 waterways. Our final species list, built using *FosSahul 2.0* and the Atlas of Living Australia,  
264 included 280 birds, 81 mammals, 50 reptiles, and 12 amphibians (Supplementary Table S1).

265 The fossil record and phylogeography of extant mammal species (i.e., the vertebrate class  
266 most intensively studied) from the Naracoorte region suggest that, at a fine spatial scale, the  
267 distributions of some species expanded and contracted with climatic fluctuations during the  
268 Late Pleistocene and Holocene, but that during times of contraction species persisted at a  
269 regional scale (as in our study) in refugia [42–44]. Furthermore, most extant mammals  
270 recorded in the Late Pleistocene fossil record at Naracoorte were present (living) in the  
271 Naracoorte bioregion when Europeans arrived, suggesting little species turnover (apart from  
272 megafauna) between the Late Pleistocene and European arrival [42–44]. Together, these  
273 results suggest that our approach of using the fossil record and modern presence data  
274 provides a reasonable estimate of the species likely present in the region in the Late  
275 Pleistocene.

276 To infer trophic links, we required information on each species' body mass and broad  
277 trophic category (whether it ate plants and/or fungi, invertebrates, terrestrial vertebrates, or  
278 fish). For extant species, we extracted much of this information from large databases: snake  
279 database [45]; Australian bird database [46]; *PanTHERIA* (mammal database) [47]; lizard  
280 database [48]; *AmphiBIO* (amphibian database) [49]; tropical bird database [50]; Amphibian  
281 database [51]; reptile database [52]; and Elton traits databases (mammals and birds) [53].  
282 However, information on body mass was not available for some extant reptiles and  
283 amphibians. For these species, we estimated body mass using their body length (from field



284 guides) and validated allometric relationships [45,48,51,54,55]. Extinct megafaunal species  
285 were not included in any of the aforementioned databases, so for these species we obtained  
286 body mass and diet data from the literature (see Supplementary Table S2). The 423 vertebrate  
287 species in the Naracoorte assemblage included 125 that consumed vertebrates, 249 that  
288 consumed plants, 362 that consumed invertebrates, and 48 that consumed fish  
289 (Supplementary Table S1). Of the 423 species, 273 consumed more than one of these  
290 resource groups. Mean species body mass ranged from 0.4 g to 2700 kg (Supplementary  
291 Table S1).

292

### 293 *Inferring trophic links*

294 For almost all extant species, information on trophic interactions is incomplete, but the lack  
295 of knowledge regarding trophic interactions is even greater for long-extinct species. To  
296 overcome this limitation and build realistic ecological network models, various methods have  
297 been developed for inferring trophic links using species' traits such as body size (i.e., larger  
298 predators tend to eat larger prey, and predators are usually bigger than their prey) [56]. Others  
299 have built on this approach to improve prediction accuracy [57–60] by adding phylogenetic  
300 and physiological information, prohibiting impossible or unlikely links, incorporating  
301 specific morphological features such as biting force and cuticular thickness, and taking into  
302 account abundance. However, most of this research focusses on fish or invertebrates, with the  
303 effectiveness of these methods rarely applied or validated for terrestrial vertebrates, but see  
304 [61,62].

305 We therefore developed and validated a new method, based on the body-size trophic-niche  
306 model [56], to infer trophic links between terrestrial vertebrates. The body-size trophic-niche  
307 model that we adapted consists of two quantile regressions: (i) one defining the upper prey-  
308 size limit given predator mass, and (ii) the other defining the lower prey-size limit given  
309 predator mass. If a species falls within the upper and lower limits for a particular predator, it  
310 is inferred as potential prey for that predator. We used a large predator-prey interaction  
311 dataset to identify these body-size relationships between terrestrial predators and their prey,  
312 and tested whether these relationships varied depending on the predator's taxonomic class  
313 (i.e., did including predator class as an independent variable improve the fit of the body size  
314 quantile regressions?).

315 We extracted the interaction dataset from *GloBI*, an online repository of biotic interactions  
316 [63]. The dataset consisted of 3893 records: 958 records of predation by non-marine  
317 mammals, 2711 by birds, 199 by reptiles, and 25 by amphibians (Supplementary Table S3)

318 [64]. We extracted data on mean body mass for the species from the same databases we used  
319 to add this information to the Naracoorte species list (see above). Once we identified the best  
320 trophic-niche model (i.e., the combination of quantile regressions that best fit the upper and  
321 lower prey-size limits) using the entire *GloBI* dataset and Bayesian information criterion  
322 (BIC; Supplementary Methods S1), we validated this method of assigning trophic links by  
323 comparing model performance when applied first to the *GloBI* data divided into training and  
324 validation datasets, and then to a well-resolved trophic network from the Serengeti [65] (see  
325 also S. de Visser unpublished data; Supplementary Methods S1). We used the true skill  
326 statistic to evaluate model performance and found that the top-ranked model (according to  
327 BIC) also performed best at assigning links in the validation step (Supplementary Methods  
328 S1, Supplementary Table S4, Supplementary Figure S2, script available at [64]). We used the  
329 best trophic-niche model to identify potential prey for each predator of vertebrates (see  
330 methods below; Supplementary Methods S1; script available [64]).

331 While including additional species traits could improve the accuracy of inferred predator-  
332 prey interactions, we used only three readily available traits (broad diet, body size, and  
333 predator taxonomic class — with reptiles and amphibians grouped together). We used only  
334 these three traits because: (1) using few traits is compatible with the quantile regression  
335 framework, (2) they can easily be extracted for vertebrate species in most assemblages (and  
336 therefore the method can be widely applied), and (3) our validation steps demonstrated the  
337 resulting performance of the trophic-niche model is sufficient (true skill statistic [TSS] = 0.6  
338 when applied to the Serengeti assemblage; TSS varies from -1 to 1, with a score of 0  
339 indicating no better than random; Supplementary Table S5).

340

#### 341 *Naracoorte networks*

342 To build realistic ecological networks for the Naracoorte assemblage, we applied the trophic-  
343 niche model to the species list, removed excess links between vertebrates (to account for  
344 overestimating the number of predator-prey links), and added links to non-terrestrial  
345 vertebrate food resources. However, there is uncertainty regarding which vertebrate  
346 predator/prey links to delete as well as how many links to add from non-terrestrial vertebrate  
347 food resources to vertebrates. To address this uncertainty, we used a randomization approach  
348 in the link-removal and -addition steps described below, and generated 1000 versions of the  
349 network. That is, we randomly removed (for the vertebrate predator-prey links) or added (for  
350 the herbivores, invertivores, and piscivores) links in the range indicated as realistic based on  
351 contemporary species' diet breadths. Because we do not know exactly where to add or

352 remove these links, we generated 1000 versions of the network so our results were not  
353 skewed by the particular links selected.

354 We used the trophic-niche model to assign potential predator-prey links in the Naracoorte  
355 species assemblage. Although trophic-niche models are good at identifying potential links,  
356 they almost always overestimate the number of realized links [66]. This is because predators  
357 are unlikely to consume all prey within their size range — some species are not palatable, are  
358 dangerous, too rare, difficult to capture, use different microhabitats, or have other ecological  
359 characteristics that make them unsuitable for regular consumption [66]. To build a network  
360 with a more realistic structure, we assigned a probability to each interaction based on the  
361 prey's position in the predator's prey-size range and a Gaussian distribution centred on this  
362 range (with a standard deviation equal to one quarter of the predator's prey-size range); the  
363 highest probability was for prey close to the centre of the prey-size range (i.e., centre of the  
364 distribution) and decreased the closer the prey was to the predator's limits. For each predator,  
365 we randomly sampled from a density kernel fit to published carnivore diet breadths ( $n = 12$ ;  
366 sampled between 1 and twice the maximum diet breadth in Supplementary Table S6a;  
367 Supplementary Methods S1) to select the number of potential prey that were 'realized' prey.  
368 In assigning the sampled diet breadths to individual predators, predators with more potential  
369 prey (indicated by the trophic-niche model) were assigned larger diet breadths than were  
370 those with fewer potential prey. To account for different degrees of dietary specialisation, we  
371 Poisson-resampled the number of potential prey for each predator before ranking predators  
372 according to their number of potential prey, slightly shuffling relative diet breadths between  
373 network models. Then, using the assigned diet breadths, we randomly selected from the  
374 potential prey, taking into account the probability of the predator-prey interaction. This  
375 method resulted in a vertebrate network with realistic connectance (proportion of potential  
376 links that are realized), and with most of each predator's prey closer to the centre, rather than  
377 the limits, of their prey-size range.

378 Terrestrial vertebrates not only consume other terrestrial vertebrates, they also consume  
379 invertebrates, plants, fungi, and fish. In addition to inferring trophic links among terrestrial  
380 vertebrates, we therefore needed to add links to vertebrates from these other food resources.  
381 However, we did not include detail on individual species within these resource groups  
382 because: (i) our study focusses on terrestrial vertebrate species; (ii) invertebrate, plant, and  
383 fungal diversities are not well resolved for most ecosystems (including for Late Pleistocene  
384 Naracoorte); and (iii) fish only constitute a small part of the Naracoorte community in terms  
385 of biodiversity and biomass. We therefore generated a pool of  $n$  species for each of these

386 groups ( $n = 1300$  for plants, 6000 for invertebrates, and 23 for freshwater fish), with the  
387 number of invertebrate and plant species calculated based on the described diversity in these  
388 groups relative to terrestrial vertebrate diversity in Australia [67], and the number of fish  
389 determined by the diversity of freshwater fish recorded in the Naracoorte Coastal Plains  
390 bioregion in Atlas of Living Australia ([ala.org.au](http://ala.org.au); accessed 6 April 2021). To assign links to  
391 vertebrates from species in these groups, we used published records of vertebrate diet breadth  
392 for 20 herbivores, 6 invertivores, and 9 piscivores (Supplementary Tables S6a and 6b). We fit  
393 kernel densities to the invertivore, herbivore, and piscivore diet breadth data, and randomly  
394 sampled (within a diet breadth range of 1 to twice the maximum diet breadth recorded for that  
395 trophic guild in Supplementary Table S6a and S6b) from these distributions to assign the  
396 number of links between each resource group and vertebrate consumer in each of the 1000  
397 network models. However, because the published piscivore diet breadths (Supplementary  
398 Table S6b) came from terrestrial Australian predators that are not exclusively piscivorous, we  
399 multiplied the number of fish in the diets of these predators by the number of resource groups  
400 from which the predator fed before fitting and sampling from the kernel densities. This  
401 modification was made to offset the adjustment accounting for inflated diet breadths in  
402 omnivores (described below).

403 For vertebrates that fed from more than one group (i.e., omnivores, which represent over  
404 half the vertebrates in this network), we proportionally adjusted the number of ‘in’ links  
405 (food resources) depending on how many food groups they fed. For example, if a  
406 species consumed from two groups (e.g., vertebrates and invertebrates), we randomly deleted  
407 half of the links from each group; if they fed from three groups, we randomly removed two-  
408 thirds of the links from each food group (and so on). We made these deletions to prevent  
409 omnivores from having inflated diet breadths.

410 In some cases involving water birds, we used empirical evidence to avoid assigning  
411 unrealistic trophic links. For example, pelicans are large and, consequently, the trophic-niche  
412 model predicts that pelicans take large vertebrate prey. However, we know that pelicans are  
413 not birds of prey and do not consume large terrestrial animals. Thus, we restricted the  
414 allocation of trophic links for such birds to prevent them from feeding on unrealistically large  
415 terrestrial vertebrates (they were prevented from consuming prey that weighed over a third of  
416 their body mass).

417 We completed the networks by generating links from plants to invertebrates and from  
418 plants to fish. To determine diet breadth for these herbivores, we sampled from a Pareto

419 distribution ( $\alpha = 1.02$ , truncated at 52) following ref [68]. The  $\alpha$  and truncation  
420 values were based on a temperate woodland system (i.e., similar to Naracoorte) [68–70].

421

#### 422 *Analysis of Naracoorte models*

423 We estimated the coextinction vulnerability of Naracoorte vertebrates using the same  
424 simulation approach as we applied to the synthetic networks i.e., plant nodes were iteratively  
425 (and randomly) removed to simulate primary extinctions, and coextinctions were triggered  
426 when animals lost all their food resources. We measured each species' coextinction  
427 vulnerability as the proportion of plant nodes remaining when coextinction occurred. We  
428 repeated the simulations 1000 times for each of the 1000 network models to test whether: (1)  
429 the effects of trophic level, diet breadth, and basal connections (direct and indirect) on  
430 coextinction vulnerability were consistent with results obtained from the synthetic models,  
431 and (2) vulnerability to bottom-up cascades differed between extinct and extant species.

432 To test whether the coextinction vulnerability results were consistent with those from the  
433 synthetic models, we fit linear-regression models to the data with vulnerability to  
434 coextinction cascades as the response, and trophic level, diet breadth, basal connections, and  
435 the interactions between these variables as independent variables (fixed effects). Rather than  
436 using the raw data from the 1000 network models, we used each species mean value for each  
437 trait and vulnerability for these analyses. We then compared relative model probabilities  
438 ( $wAIC_c$ ) for the full model to all possible reduced models, and examined the coefficients of  
439 the main effects to determine if they were similar to those obtained from the synthetic  
440 networks.

441 We compared susceptibility of Naracoorte's extinct *versus* extant species to bottom-up  
442 coextinction cascades in three steps. First, we compared the groups in terms of their trophic  
443 level, diet breadth, and number of basal connections to determine if differences in these  
444 variables suggest one group would be more vulnerable than the other. Second, to test for an  
445 association between coextinction vulnerability and extinction status, we compared  $wAIC_c$   
446 support for two models: a null model with vulnerability to coextinction as the dependent  
447 variable and no fixed effects *versus* a model that was identical to the first model, except with  
448 extinction status as an independent variable. Third, we ran a randomization test to assess the  
449 probability that extinct species were more vulnerable to coextinction than were extant  
450 species. Here, we sampled the coextinction vulnerabilities of 10 extinct and 10 extant species  
451 from each of the 1000 models 20 times (i.e., using the raw data rather than species means),

452 and each time calculated the mean difference in coextinction vulnerability between the two  
453 groups.

454 We also assessed the position of extinct *versus* extant species in the network using 12  
455 different network metrics: *trophic level*, *pageRank*, *betweenness centrality*, *eigenvector*  
456 *centrality*, *closeness centrality (in)*, *coreness (in)*, *degree (in)*, *eccentricity (in)*, *closeness*  
457 *centrality (out)*, *coreness (out)*, *degree (out)*, and *eccentricity (out)* (Supplementary Table S7  
458 for metric descriptions). We calculated the metrics followed by an ‘in’ or ‘out’ for each node  
459 using links pointing towards (in) or away from (out) the focal node. We chose these metrics  
460 because they are commonly used, node-level metrics describing position in the network. For  
461 each metric, we calculated the species’ mean value across the 1000 network models. After  
462 checking for highly correlated metrics and removing those identified as redundant (i.e.,  
463 metrics that had a Spearman’s  $\rho > 0.8$ ), we ran a principal component analysis and visually  
464 inspected for grouping of extinct and extant species. The reduced list of metrics included  
465 *closeness centrality (out)*, *eccentricity (out)*, *degree (in)*, *coreness (in)*, *betweenness*, and  
466 *PageRank*.

467

## 468 **Results**

### 469 *Synthetic networks*

470 The two methods calculating bottom-up coextinction vulnerability (simulation and Bayesian  
471 network) yielded similar results in terms of the effects of trophic level, diet breadth, and basal  
472 connections on node vulnerability to bottom-up coextinction cascades.  $wAIC_c$  indicated that  
473 the full models (i.e., that had all three independent variables and their interactions) were more  
474 strongly supported than reduced models using both approaches, with the full models having  
475  $wAIC_c > 0.999$  (Supplementary Tables S8 and S9). The weighted model-averaged  
476 coefficients describing the relationships between the three independent variables and  
477 coextinction vulnerability were negative, irrespective of which of the two methods we used to  
478 calculate vulnerability (Figure 3A; Supplementary Tables S8 and S9). These negative  
479 correlations indicate that vulnerability to bottom-up cascades decreased with increasing  
480 number of basal connections, diet breadth, and trophic level. Marginal  $R^2$  of the three reduced  
481 models, each of which had one of the three variables as a main effect, suggest that the  
482 number of basal connections explained most of the variation in coextinction vulnerability in  
483 the synthetic networks (Figure 3B). We restricted our analyses of the Naracoorte network  
484 models to the simulation method because both approaches yielded similar results, and

485 because the Bayesian network method was prohibitively time consuming for networks of the  
486 size of the Naracoorte models.

487

#### 488 *Naracoorte network*

489 In terms of the effects of trophic level, diet breadth, and basal connections on vulnerability,  
490 the patterns in the Naracoorte network were similar to those from the synthetic networks  
491 (Supplementary Table S10).  $wAIC_c$  strongly supported the full model over reduced models  
492 ( $wAIC_c \approx 1$  for the full model; Supplementary Table S10), and the three main effects were  
493 negatively correlated with coextinction vulnerability (Figure 4A; Supplementary Table S10).  
494 Reduced models that had either trophic level, diet breadth, or basal connections as the only  
495 independent variable had  $R^2 > 0.23$ , indicating that each of these variables were associated  
496 with a substantial proportion of variation in vulnerability (Figure 4B).

497 Extinct species had fewer basal connections, narrower diet breadths, and came from lower  
498 trophic levels, on average, than those species that survived into the Holocene (Figure 5A-C;  
499 mean basal connections: 298 vs. 515; diet breadth: 34 vs. 79; and trophic level: 2.3 vs. 2.9 for  
500 extinct *versus* extant species). Extinct species also had higher coextinction vulnerability than  
501 did surviving species (Figure 5D; mean coextinction vulnerability  $\pm$  95% confidence interval:  
502  $0.045 \pm 0.015$  vs.  $0.008 \pm 0.002$  for extinct and extant species, respectively), a result  
503 consistent with coextinction vulnerability being higher for species with fewer basal  
504 connections, narrower diet breadth, and from lower trophic levels.

505 To test for an association between species' extinction status and vulnerability to bottom-up  
506 cascades, we compared support for a model with coextinction vulnerability as the dependent  
507 variable and extinction status as the only fixed effect *versus* a null model (a random-intercept  
508 model with no fixed effects), and we also did a randomization test comparing the  
509 coextinction vulnerability of extinct *versus* extant species. Both approaches indicated that  
510 extinction status was associated with vulnerability to bottom-up cascades, with extinct  
511 species more vulnerable than those that survived into the Holocene. The  $wAIC_c$  for the model  
512 with extinction status as a fixed effect was  $\sim 1$ , indicating that this model was strongly  
513 supported over the null model. The randomization test showed that extinct species had a  
514 probability of 0.91 of being more vulnerable to bottom-up coextinctions than extant species  
515 (Figure 6).

516 Extinct species differed from extant species in terms of their position in the network.  
517 Principal component analysis of six network-position metrics showed that extinct and extant  
518 species fell into two distinct groups according to the second principal component (dimension

519 2 in Figure 7A). The main contributors to this principal component are metrics describing a  
520 node's connection to the network through its 'out' links, including the closeness centrality  
521 (out) and eccentricity (out) metrics (Figure 7A; Supplementary Figures S3 and S4). Closer  
522 examination of the out links (i.e., number of predators) showed that, on average, extinct  
523 species had  $< 1$  predator, whereas extant species had  $> 3$  (Figure 7B; mean number of  
524 predators: 0.2 vs. 3.3 for extinct vs. extant species). Indeed, the average number of predators  
525 was lower for extinct than extant species in all 1000 models of the Naracoorte network.

526

## 527 **Discussion**

528 Our analyses demonstrate that a species' vulnerability to bottom-up coextinction cascades  
529 varies depending on its trophic level, diet breadth, and number of basal connections. We also  
530 found that the position of extinct species in the Naracoorte network — being primarily  
531 herbivorous (low trophic level), and therefore having relatively narrow diet breadths and few  
532 pathways to basal resources — might have made them more vulnerable to bottom-up  
533 coextinction cascades than were co-occurring species that survived into the Holocene. The  
534 Naracoorte results suggest that trophic cascades potentially contributed to the megafauna  
535 extinction event in south-eastern Sahul. However, the extinct species from Naracoorte also  
536 had fewer predators than did extant species, a network position attribute that would likely  
537 have made them more vulnerable to the arrival of the new 'super predator' — humans [71].

538 The Naracoorte and synthetic network models revealed that vulnerability to bottom-up  
539 coextinction cascades precipitated by plant extinctions decreased with increasing trophic  
540 level, diet breadth, and number of basal connections (Figures 3 and 4; Supplementary Tables  
541 S8, S9 and S10). Our results therefore support previous findings that species with narrower  
542 diet breadths/fewer pathways to basal resources are more vulnerable to bottom-up  
543 coextinction cascades [72–74]. However, previous research does not provide a clear  
544 expectation regarding the relationship between trophic level and extinction vulnerability. It is  
545 often assumed that higher trophic levels are more vulnerable to extinction than are lower  
546 levels due to the cumulative effects of disturbances on lower trophic levels (on which higher  
547 trophic levels depend), and direct persecution by humans [8,9]. However, our analyses that  
548 specifically tested for sensitivity of species to primary extinctions in the plant community  
549 imply that vulnerability to these bottom-up cascades in fact *decreases* with trophic level.  
550 Consistent with these results, several manipulative experiments of ecological communities



551 have revealed that changes in the plant component of the community most strongly affect  
552 herbivores, and impacts on higher trophic levels diminish with trophic distance [10,13,75].

553 This pattern has also been identified in theoretical studies. Applying Rosenzweig–  
554 MacArthur models and synthetic (but ecologically feasible) networks, the loss of primary  
555 producers triggered extinctions in herbivores before doing so in carnivores, and herbivores  
556 were more vulnerable to these cascades than were carnivores [74]. However, our  
557 vulnerability scores were based on coextinction being triggered when a consumer lost all  
558 food resources. Coextinctions could be triggered at lower thresholds and/or vary between  
559 species. While the congruence between our results and those from previous studies support  
560 the methods and threshold we used, further investigation into how coextinction threshold  
561 influences the effect of network position on node vulnerability, as well as how coextinction  
562 thresholds covary with species/community traits, is needed to refine methods for predicting  
563 the probability and magnitude of bottom-up cascades.

564 The extinction pattern observed in the Naracoorte assemblage could have been the result  
565 of bottom-up cascades triggered by changes in the plant community, as demonstrated by our  
566 vulnerability modelling. This leads to the question: did vegetation change at the same time as  
567 the megafauna disappeared? Studies in other regions of Sahul have detected shifts in  
568 vegetation roughly coinciding with, or immediately preceding, megafauna extinction.  
569 Hypothesised drivers of these vegetation shifts include land-use changes associated with  
570 human arrival (i.e., fire-stick farming) [28,76] and/or climate change [77]. However, there are  
571 no detailed studies on the vegetation of Naracoorte spanning the Late Pleistocene extinction  
572 event (but see [78] for a review of broad proxies of vegetative change over this period). The  
573 megafauna's disappearance from Naracoorte did, nonetheless, coincide with an unusually  
574 cool period (Supplementary Figure S5) and the arrival of humans (~ 44,000 years ago) [25],  
575 offering the intriguing possibility that changes in climate and/or land use triggered shifts in  
576 vegetation that had consequences for higher trophic levels in the network. To evaluate this  
577 possibility, more studies are required to model vegetation changes in south-eastern Sahul  
578 (including the Naracoorte region), and these must be validated using the pollen record and/or  
579 other fossil data.

580 By considering the network position of all vertebrate species in the assemblage, a clear  
581 difference between extinct and extant species emerged — extinct species had fewer predators  
582 than did species that survived (mean number of predators: 0.2 *versus* 3.3 for extinct *versus*  
583 extant species, respectively; Figure 4B). This predator naivety, coupled with the species'  
584 slow life histories, likely made megafauna especially vulnerable to new predators [34,79–81]

585 and suggests that hunting by humans could have adversely affected megafauna. Thus, a  
586 network modelling approach to assessing extinction vulnerability suggests that bottom-up  
587 and/or top-down processes could have selectively removed the now-extinct species from the  
588 Naracoorte community. However, there remains scope to address uncertainties regarding the  
589 structure of the Naracoorte network and the methods for estimating vulnerability to  
590 ecological cascades. As palaeo-vegetation, invertebrate, trophic (including detailed  
591 information on the diets of extinct species), and climate data improve, network models can  
592 incorporate this information to build more refined networks, and include more detailed top-  
593 down and bottom-up forcings to assess the plausibility of the different potential causes and  
594 pathways to extinction — including what (if any) role humans played in the megafauna’s  
595 demise.

596 In summary, our network modelling of Late Pleistocene Naracoorte suggests bottom-up  
597 coextinction cascades and/or predator naivety and the arrival of humans could have  
598 contributed to the megafauna extinction event in Sahul. Indeed, that our network models  
599 showed that extinct species were vulnerable to bottom-up cascades *and* new predation  
600 pressures lends support to recent research suggesting that climate change (that can shift  
601 vegetation and lead to bottom-up cascades) and human arrival together drove the megafauna  
602 extinction trajectories in much of south-eastern Sahul [25]. Our research, along with other  
603 recent studies [19,62,82], demonstrates that network modelling is a powerful tool for  
604 investigating and understanding ancient extinction events. By developing methods to model  
605 whole-community responses to change and validating these methods using ancient extinction  
606 events, we can also provide better estimates of the fates of contemporary communities as the  
607 sixth mass-extinction event unfolds [83].

608

### 609 **Acknowledgements**

610 We thank E. Reed, C. Carbone, M. Tucker, C. Dickman and V.K. Llewelyn for their  
611 constructive input.

612

### 613 **Funding**

614 This work was supported by the Australian Research Council Centre of Excellence for  
615 Australian Biodiversity and Heritage (grant number CE170100015).

616

## 617 References

- 618 1. Dunn RR, Harris NC, Colwell RK, Koh LP, Sodhi NS. 2009 The sixth mass coextinction: are  
619 most endangered species parasites and mutualists? *Proc. R. Soc. B* **276**, 3037–3045.  
620 (doi:10.1098/rspb.2009.0413)
- 621 2. Koh LP, Dunn RR, Sodhi NS, Colwell RK, Proctor HC, Smith VS. 2004 Species coextinctions  
622 and the biodiversity crisis. *Science* **305**, 4. (doi:10.1126/science.1101101)
- 623 3. Colwell RK, Dunn RR, Harris NC. 2012 Coextinction and persistence of dependent species  
624 in a changing world. *Annu. Rev. Ecol. Evol. Syst.* **43**, 183–203. (doi:10.1146/annurev-  
625 ecolsys-110411-160304)
- 626 4. Estes JA *et al.* 2011 Trophic downgrading of Planet Earth. *Science* **333**, 301–306.  
627 (doi:10.1126/science.1205106)
- 628 5. Kagata H, Ohgushi T. 2006 Bottom-up trophic cascades and material transfer in  
629 terrestrial food webs. *Ecol. Res.* **21**, 26–34. (doi:10.1007/s11284-005-0124-z)
- 630 6. Schoener TW. 1989 Food webs from the small to the large: the Robert H. MacArthur  
631 award lecture. *Ecology* **70**, 1559–1589. (doi:10.2307/1938088)
- 632 7. Didham RK, Lawton JH, Hammond PM, Eggleton P. 1998 Trophic structure stability and  
633 extinction dynamics of beetles (Coleoptera) in tropical forest fragments. *Phil. Trans. R.  
634 Soc. Lond. B* **353**, 437–451. (doi:10.1098/rstb.1998.0221)
- 635 8. Duffy JE. 2003 Biodiversity loss, trophic skew and ecosystem functioning. *Ecol. Lett.* **6**,  
636 680–687. (doi:10.1046/j.1461-0248.2003.00494.x)
- 637 9. Purvis A, Gittleman JL, Cowlshaw G, Mace GM. 2000 Predicting extinction risk in  
638 declining species. *Proc. R. Soc. B* **267**, 1947–1952. (doi:10.1098/rspb.2000.1234)
- 639 10. Scherber C *et al.* 2010 Bottom-up effects of plant diversity on multitrophic interactions  
640 in a biodiversity experiment. *Nature* **468**, 553–556. (doi:10.1038/nature09492)
- 641 11. Dyer LA, Letourneau D. 2002 Top-down and bottom-up diversity cascades in detrital vs.  
642 living food webs: Diversity cascades in a tropical system. *Ecol. Lett.* **6**, 60–68.  
643 (doi:10.1046/j.1461-0248.2003.00398.x)
- 644 12. Gruner DS. 2004 Attenuation of top-down and bottom-up forces in a complex terrestrial  
645 community. *Ecology* **85**, 3010–3022. (doi:10.1890/04-0020)
- 646 13. Kagata H, Nakamura M, Ohgushi T. 2005 Bottom-up cascade in a tri-trophic system:  
647 different impacts of host-plant regeneration on performance of a willow leaf beetle and  
648 its natural enemy. *Ecol. Entomol.* **30**, 58–62. (doi:10.1111/j.0307-6946.2005.00667.x)
- 649 14. Atwood TB, Valentine SA, Hammill E, McCauley DJ, Madin EMP, Beard KH, Pearse WD.  
650 2020 Herbivores at the highest risk of extinction among mammals, birds, and reptiles.  
651 *Sci. Adv.* **6**, eabb8458. (doi:10.1126/sciadv.abb8458)

- 652 15. Säterberg T, Sellman S, Ebenman B. 2013 High frequency of functional extinctions in  
653 ecological networks. *Nature* **499**, 468–470. (doi:10.1038/nature12277)
- 654 16. Boit A, Martinez ND, Williams RJ, Gaedke U. 2012 Mechanistic theory and modelling of  
655 complex food-web dynamics in Lake Constance. *Ecol. Lett.* **15**. (doi:10.1111/j.1461-  
656 0248.2012.01777.x)
- 657 17. Coll M, Lotze HK, Romanuk TN. 2008 Structural degradation in Mediterranean sea food  
658 webs: testing ecological hypotheses using stochastic and mass-balance modelling.  
659 *Ecosystems* **11**, 939–960. (doi:10.1007/s10021-008-9171-y)
- 660 18. Pockock MJO, Evans DM, Memmott J. 2012 The robustness and restoration of a network  
661 of ecological networks. *Science* **335**, 973–977. (doi:10.1126/science.1214915)
- 662 19. Dunne JA, Labandeira CC, Williams RJ. 2014 Highly resolved early Eocene food webs  
663 show development of modern trophic structure after the end-Cretaceous extinction.  
664 *Proc. R. Soc. B* **281**, 20133280–20133280. (doi:10.1098/rspb.2013.3280)
- 665 20. Roopnarine PD. 2006 Extinction cascades and catastrophe in ancient food webs.  
666 *Paleobiology* **32**, 1–19. (doi:10.1666/05008.1)
- 667 21. Barnosky AD. 2004 Assessing the causes of Late Pleistocene extinctions on the  
668 continents. *Science* **306**, 70–75. (doi:10.1126/science.1101476)
- 669 22. Koch PL, Barnosky AD. 2006 Late Quaternary extinctions: state of the debate. *Annu. Rev.*  
670 *Ecol. Evol. Syst.* **37**, 215–250. (doi:10.1146/annurev.ecolsys.34.011802.132415)
- 671 23. Lorenzen ED *et al.* 2011 Species-specific responses of Late Quaternary megafauna to  
672 climate and humans. *Nature* **479**, 359–364. (doi:10.1038/nature10574)
- 673 24. Metcalf JL *et al.* 2016 Synergistic roles of climate warming and human occupation in  
674 Patagonian megafaunal extinctions during the Last Deglaciation. *Sci. Adv.* **2**, e1501682.  
675 (doi:10.1126/sciadv.1501682)
- 676 25. Saltré F, Chadoeuf J, Peters KJ, McDowell MC, Friedrich T, Timmermann A, Ulm S,  
677 Bradshaw CJA. 2019 Climate-human interaction associated with southeast Australian  
678 megafauna extinction patterns. *Nat. Commun.* **10**, 5311. (doi:10.1038/s41467-019-  
679 13277-0)
- 680 26. Galetti M *et al.* 2018 Ecological and evolutionary legacy of megafauna extinctions:  
681 anachronisms and megafauna interactions. *Biol. Rev.* **93**, 845–862.  
682 (doi:10.1111/brv.12374)
- 683 27. Ripple WJ, Van Valkenburgh B. 2010 Linking top-down forces to the Pleistocene  
684 megafaunal extinctions. *BioScience* **60**, 516–526. (doi:10.1525/bio.2010.60.7.7)
- 685 28. Miller GH. 2005 Ecosystem Collapse in Pleistocene Australia and a Human Role in  
686 Megafaunal Extinction. *Science* **309**, 287–290. (doi:10.1126/science.1111288)

- 687 29. Villavicencio NA, Lindsey EL, Martin FM, Borrero LA, Moreno PI, Marshall CR, Barnosky  
688 AD. 2016 Combination of humans, climate, and vegetation change triggered Late  
689 Quaternary megafauna extinction in the Última Esperanza region, southern Patagonia,  
690 Chile. *Ecography* **39**, 125–140. (doi:10.1111/ecog.01606)
- 691 30. Faith JT. 2011 Late Pleistocene climate change, nutrient cycling, and the megafaunal  
692 extinctions in North America. *Quaternary Science Reviews* **30**, 1675–1680.  
693 (doi:10.1016/j.quascirev.2011.03.011)
- 694 31. Araújo T, Machado H, Mothé D, dos Santos Avilla L. 2021 Species distribution modeling  
695 reveals the ecological niche of extinct megafauna from South America. *Quat. res.* , 1–8.  
696 (doi:10.1017/qua.2021.24)
- 697 32. Johnson C. 2006 *Australia's mammal extinctions: a 50,000-year history*. Cambridge  
698 University Press.
- 699 33. Stuart AJ. 2015 Late Quaternary megafaunal extinctions on the continents: a short  
700 review. *Geol. J.* **50**, 338–363. (doi:10.1002/gj.2633)
- 701 34. Johnson CN *et al.* 2016 What caused extinction of the Pleistocene megafauna of Sahul?  
702 *Proc. R. Soc. B* **283**, 20152399. (doi:10.1098/rspb.2015.2399)
- 703 35. Peters KJ, Saltré F, Friedrich T, Jacobs Z, Wood R, McDowell M, Ulm S, Bradshaw CJA.  
704 2019 FosSahul 2.0, an updated database for the Late Quaternary fossil records of Sahul.  
705 *Sci. Data* **6**, 272. (doi:10.1038/s41597-019-0267-3)
- 706 36. Eklöf A, Tang S, Allesina S. 2013 Secondary extinctions in food webs: a Bayesian network  
707 approach. *Methods Ecol. Evol.* **4**, 760–770. (doi:10.1111/2041-210X.12062)
- 708 37. Reed EH, Bourne SJ. 2009 Pleistocene fossil vertebrate sites of the south east region of  
709 South Australia II. *T. Roy. Soc. South Aust.* **133**, 30–40.  
710 (doi:10.1080/03721426.2009.10887108)
- 711 38. Macken AC, Reed EH. 2013 Late Quaternary small mammal faunas of the Naracoorte  
712 Caves World Heritage Area. *T. Roy. Soc. South Aust.* **137**, 53–67.  
713 (doi:10.1080/3721426.2013.10887171)
- 714 39. Rodríguez-Rey M *et al.* 2016 Data descriptor: a comprehensive database of quality-rated  
715 fossil ages for Sahul's Quaternary vertebrates. *Sci. Data* **3**, 1–7.  
716 (doi:10.1038/sdata.2016.53)
- 717 40. Rodríguez-Rey M *et al.* 2015 Criteria for assessing the quality of Middle Pleistocene to  
718 Holocene vertebrate fossil ages. *Quat. Geochronol.* **30**, 69–79.  
719 (doi:10.1016/j.quageo.2015.08.002)
- 720 41. Starrfelt J, Liow LH. 2016 How many dinosaur species were there? Fossil bias and true  
721 richness estimated using a Poisson sampling model. *Phil. Trans. R. Soc. B* **371**, 20150219.  
722 (doi:10.1098/rstb.2015.0219)

- 723 42. Macken AC, Reed EH. 2014 Postglacial reorganization of a small-mammal  
724 paleocommunity in southern Australia reveals thresholds of change. *Ecol. Monogr.* **84**,  
725 563–577. (doi:10.1890/13-0713.1)
- 726 43. Macken AC, Prideaux GJ, Reed EH. 2012 Variation and pattern in the responses of  
727 mammal faunas to Late Pleistocene climatic change in southeastern South Australia. *J.*  
728 *Quat. Sci.* **27**, 415–424. (doi:10.1002/jqs.1563)
- 729 44. Prideaux GJ, Roberts RG, Megirian D, Westaway KE, Hellstrom JC, Olley JM. 2007  
730 Mammalian responses to Pleistocene climate change in southeastern Australia. *Geology*  
731 **35**, 33–36. (doi:10.1130/G23070A.1)
- 732 45. Feldman A, Meiri S. 2013 Length-mass allometry in snakes: snake length-mass allometry.  
733 *Biol. J. Linnean. Soc.* **108**, 161–172. (doi:10.1111/j.1095-8312.2012.02001.x)
- 734 46. Garnett ST *et al.* 2015 Biological, ecological, conservation and legal information for all  
735 species and subspecies of Australian bird. *Sci. Data* **2**, 150061.  
736 (doi:10.1038/sdata.2015.61)
- 737 47. Jones KE *et al.* 2009 PanTHERIA: a species-level database of life history, ecology, and  
738 geography of extant and recently extinct mammals: *Ecological Archives* E090-184.  
739 *Ecology* **90**, 2648–2648. (doi:10.1890/08-1494.1)
- 740 48. Meiri S. 2010 Length-weight allometries in lizards. *J. Zool.* (doi:10.1111/j.1469-  
741 7998.2010.00696.x)
- 742 49. Oliveira BF, São-Pedro VA, Santos-Barrera G, Penone C, Costa GC. 2017 AmphiBIO, a  
743 global database for amphibian ecological traits. *Sci. Data* **4**, 170123.  
744 (doi:10.1038/sdata.2017.123)
- 745 50. Read QD, Baiser B, Grady JM, Zarnetske PL, Record S, Belmaker J. 2018 Tropical bird  
746 species have less variable body sizes. *Biol. Lett.* **14**, 20170453.  
747 (doi:10.1098/rsbl.2017.0453)
- 748 51. Santini L, Benítez-López A, Ficetola GF, Huijbregts MAJ. 2018 Length-mass allometries in  
749 amphibians. *Integr. Zool.* **13**, 36–45. (doi:10.1111/1749-4877.12268)
- 750 52. Slavenko A, Tallowin OJS, Itescu Y, Raia P, Meiri S. 2016 Late Quaternary reptile  
751 extinctions: size matters, insularity dominates. *Global Ecol. Biogeogr.* **25**, 1308–1320.  
752 (doi:10.1111/geb.12491)
- 753 53. Wilman H, Belmaker J, Simpson J, de la Rosa C, Rivadeneira MM, Jetz W. 2014  
754 EltonTraits 1.0: Species-level foraging attributes of the world’s birds and mammals:  
755 *Ecological Archives* E095-178. *Ecology* **95**, 2027–2027. (doi:10.1890/13-1917.1)
- 756 54. Cogger H. 2014 *Reptiles and amphibians of Australia*. CSIRO publishing.
- 757 55. Wilson SK, Swan G. 2008 *A complete guide to reptiles of Australia*. 2nd Ed. New Holland  
758 Publishers.

- 759 56. Gravel D, Poisot T, Albouy C, Velez L, Mouillot D. 2013 Inferring food web structure from  
760 predator-prey body size relationships. *Methods Ecol. Evol.* **4**, 1083–1090.  
761 (doi:10.1111/2041-210X.12103)
- 762 57. Brose U *et al.* 2019 Predator traits determine food-web architecture across ecosystems.  
763 *Nat. Ecol. Evol.* **3**, 919–927. (doi:10.1038/s41559-019-0899-x)
- 764 58. Brousseau P-M, Gravel D, Handa IT. 2018 Trait matching and phylogeny as predictors of  
765 predator-prey interactions involving ground beetles. *Funct. Ecol.* **32**, 192–202.  
766 (doi:10.1111/1365-2435.12943)
- 767 59. Eklof A, Helmus MR, Moore M, Allesina S. 2012 Relevance of evolutionary history for  
768 food web structure. *Proc. R. Soc. B* **279**, 1588–1596. (doi:10.1098/rspb.2011.2149)
- 769 60. McLeod AM, Leroux SJ, Chu C. 2020 Effects of species traits, motif profiles, and  
770 environment on spatial variation in multi-trophic antagonistic networks. *Ecosphere* **11**.  
771 (doi:10.1002/ecs2.3018)
- 772 61. Morales-Castilla I, Matias MG, Gravel D, Araújo MB. 2015 Inferring biotic interactions  
773 from proxies. *Trends Ecol. Evol.* **30**, 347–356. (doi:10.1016/j.tree.2015.03.014)
- 774 62. Pires MM, Koch PL, Fariña RA, de Aguiar MAM, dos Reis SF, Guimarães PR. 2015  
775 Pleistocene megafaunal interaction networks became more vulnerable after human  
776 arrival. *Proc. R. Soc. B* **282**, 20151367. (doi:10.1098/rspb.2015.1367)
- 777 63. Poelen JH, Simons JD, Mungall CJ. 2014 Global Biotic Interactions: an open infrastructure  
778 to share and analyze species-interaction datasets. *Ecol. Inform.*  
779 (doi:10.1016/j.ecoinf.2014.08.005)
- 780 64. Llewelyn J, Strona G, Bradshaw CJA. 2020 Inferring networks and modelling trophic  
781 cascades. *GitHub and Zenodo* (doi:10.5281/zenodo.3756224)
- 782 65. de Visser SN, Freymann BP, Olf H. 2011 The Serengeti food web: empirical  
783 quantification and analysis of topological changes under increasing human impact:  
784 Topological changes under human impact. *J. Anim. Ecol.* **80**, 484–494.  
785 (doi:10.1111/j.1365-2656.2010.01787.x)
- 786 66. Marples NM, Speed MP, Thomas RJ. 2018 An individual-based profitability spectrum for  
787 understanding interactions between predators and their prey. *Biological Journal of the*  
788 *Linnean Society* **125**, 1–13. (doi:10.1093/biolinnean/bly088)
- 789 67. Chapman AD. 2009 Numbers of living species in Australia and the world. , 1–78.
- 790 68. Forister ML *et al.* 2015 The global distribution of diet breadth in insect herbivores. *Proc.*  
791 *Natl. Acad. Sci. USA* **112**, 442–447. (doi:10.1073/pnas.1423042112)
- 792 69. Fraser RA, Wells RT. 2006 Palaeontological excavation and taphonomic investigation of  
793 the late Pleistocene fossil deposit in Grant Hall, Victoria Fossil Cave, Naracoorte, South  
794 Australia. *Alcheringa* **30**, 147–161. (doi:10.1080/03115510609506860)

- 795 70. Reed L. 2012 Of mice and megafauna: new insights into Naracoorte’s fossil deposits.  
796 *Journal of the Australasian Cave and Karst Management Association* **86**, 7–14.  
797 (doi:hdl.handle.net/2440/93551)
- 798 71. Darimont CT, Fox CH, Bryan HM, Reimchen TE. 2015 The unique ecology of human  
799 predators. *Science* **349**, 858–860. (doi:10.1126/science.aac4249)
- 800 72. Chichorro F, Juslén A, Cardoso P. 2019 A review of the relation between species traits  
801 and extinction risk. *Biological Conservation* **237**, 220–229.  
802 (doi:10.1016/j.biocon.2019.07.001)
- 803 73. Purvis A, Jones KE, Mace GM. 2000 Extinction. *BioEssays* **22**, 1123–1133.  
804 (doi:10.1002/1521-1878(200012)22:12<1123::AID-BIES10>3.0.CO;2-C)
- 805 74. Kaneryd L *et al.* 2012 Species-rich ecosystems are vulnerable to cascading extinctions in  
806 an increasingly variable world: Extinction Cascades in a Variable World. *Ecol. Evol.* **2**,  
807 858–874. (doi:10.1002/ece3.218)
- 808 75. Schädler M, Brandl R, Kempel A. 2010 Host plant genotype determines bottom-up  
809 effects in an aphid-parasitoid-predator system. *Entomol. Exp. Appl.* **135**, 162–169.  
810 (doi:10.1111/j.1570-7458.2010.00976.x)
- 811 76. Turney CSM *et al.* 2001 Redating the onset of burning at Lynch’s Crater (North  
812 Queensland): implications for human settlement in Australia. *J. Quaternary Sci.* **16**, 767–  
813 771. (doi:10.1002/jqs.643)
- 814 77. DeSantis LRG, Field JH, Wroe S, Dodson JR. 2017 Dietary responses of Sahul (Pleistocene  
815 Australia–New Guinea) megafauna to climate and environmental change. *Paleobiology*  
816 **43**, 181–195. (doi:10.1017/pab.2016.50)
- 817 78. Bampton T. 2021 Palaeoenvironmental proxies used to reconstruct the Quaternary of  
818 Australia: a case study from Naracoorte Caves, South Australia. *Helicite* **46**, 1–13.
- 819 79. Flannery TF. 1990 Pleistocene faunal loss: implications of the aftershock for Australia’s  
820 past and future. *Archaeol. Oceania* **25**, 45–55. (doi:10.1002/j.1834-  
821 4453.1990.tb00232.x)
- 822 80. Johnson CN. 2002 Determinants of loss of mammal species during the Late Quaternary  
823 ‘megafauna’ extinctions: life history and ecology, but not body size. *Proc. R. Soc. B* **269**,  
824 2221–2227. (doi:10.1098/rspb.2002.2130)
- 825 81. Bradshaw CJ, Johnson CN, Llewelyn J, Weisbecker V, Strona G, Saltré F. 2021 Relative  
826 demographic susceptibility does not explain the extinction chronology of Sahul’s  
827 megafauna. *eLife* **10**, e63870. (doi:10.7554/eLife.63870)
- 828 82. Roopnarine PD, Angielczyk KD, Wang SC, Hertog R. 2007 Trophic network models  
829 explain instability of Early Triassic terrestrial communities. *Proc. R. Soc. B* **274**, 2077–  
830 2086. (doi:10.1098/rspb.2007.0515)



831 83. Ceballos G, Ehrlich PR, Dirzo R. 2017 Biological annihilation via the ongoing sixth mass  
832 extinction signaled by vertebrate population losses and declines. *Proc. Natl. Acad. Sci.*  
833 *USA* **114**, E6089–E6096. (doi:10.1073/pnas.1704949114)

834

835



**Figure 1**

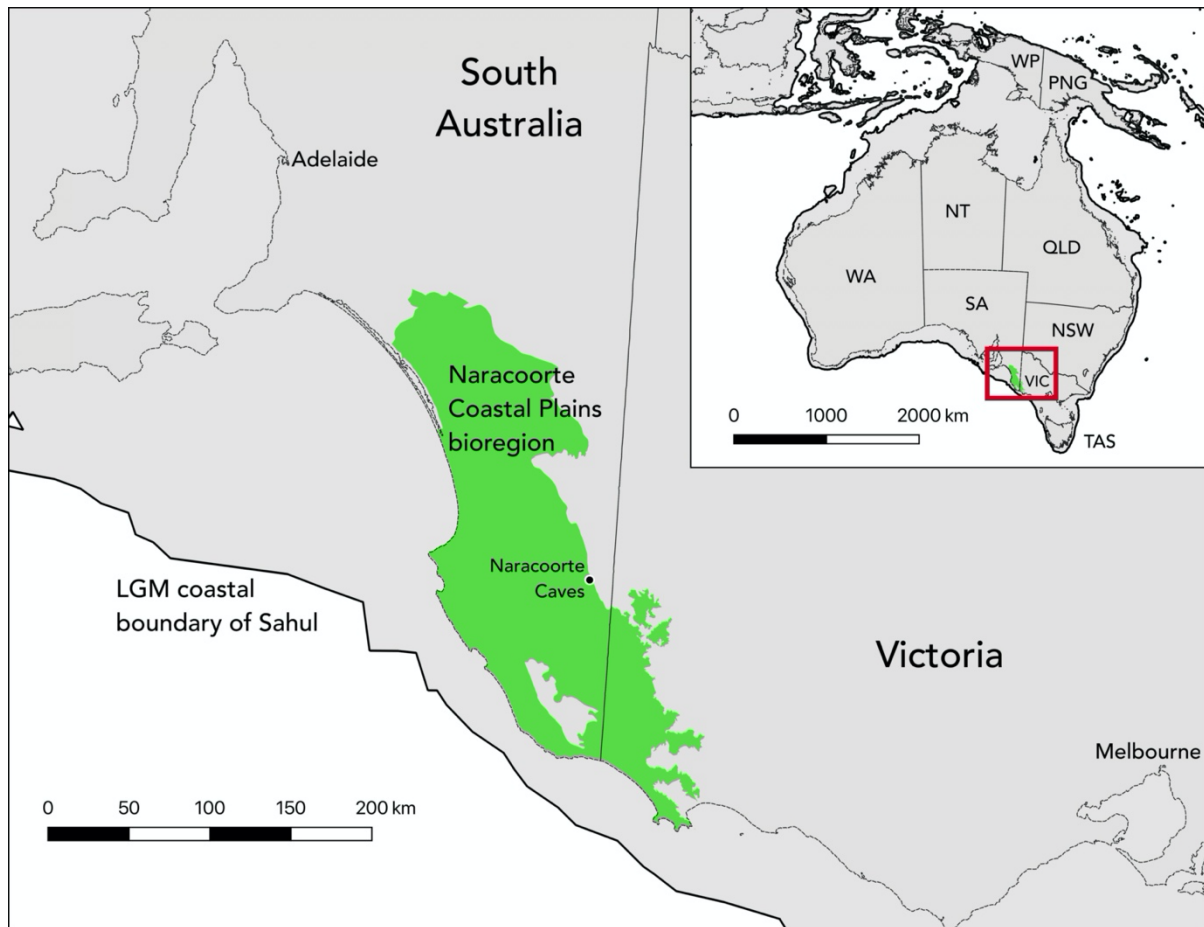

**Figure 1.** Sahul (top right insert) and the Naracoorte bioregion/Naracoorte Caves in south-eastern Sahul (main figure). These maps show coastline/sea level as they were during the Last Glacial Maximum (LGM; approximately 19,000 to 26,500 years ago). The grey area and thick outline indicate the land area during the LGM, the thinner lines show present-day coastlines and borders between countries and Australian states and territories, and the green area highlights the Naracoorte bioregion.

**Figure 2**

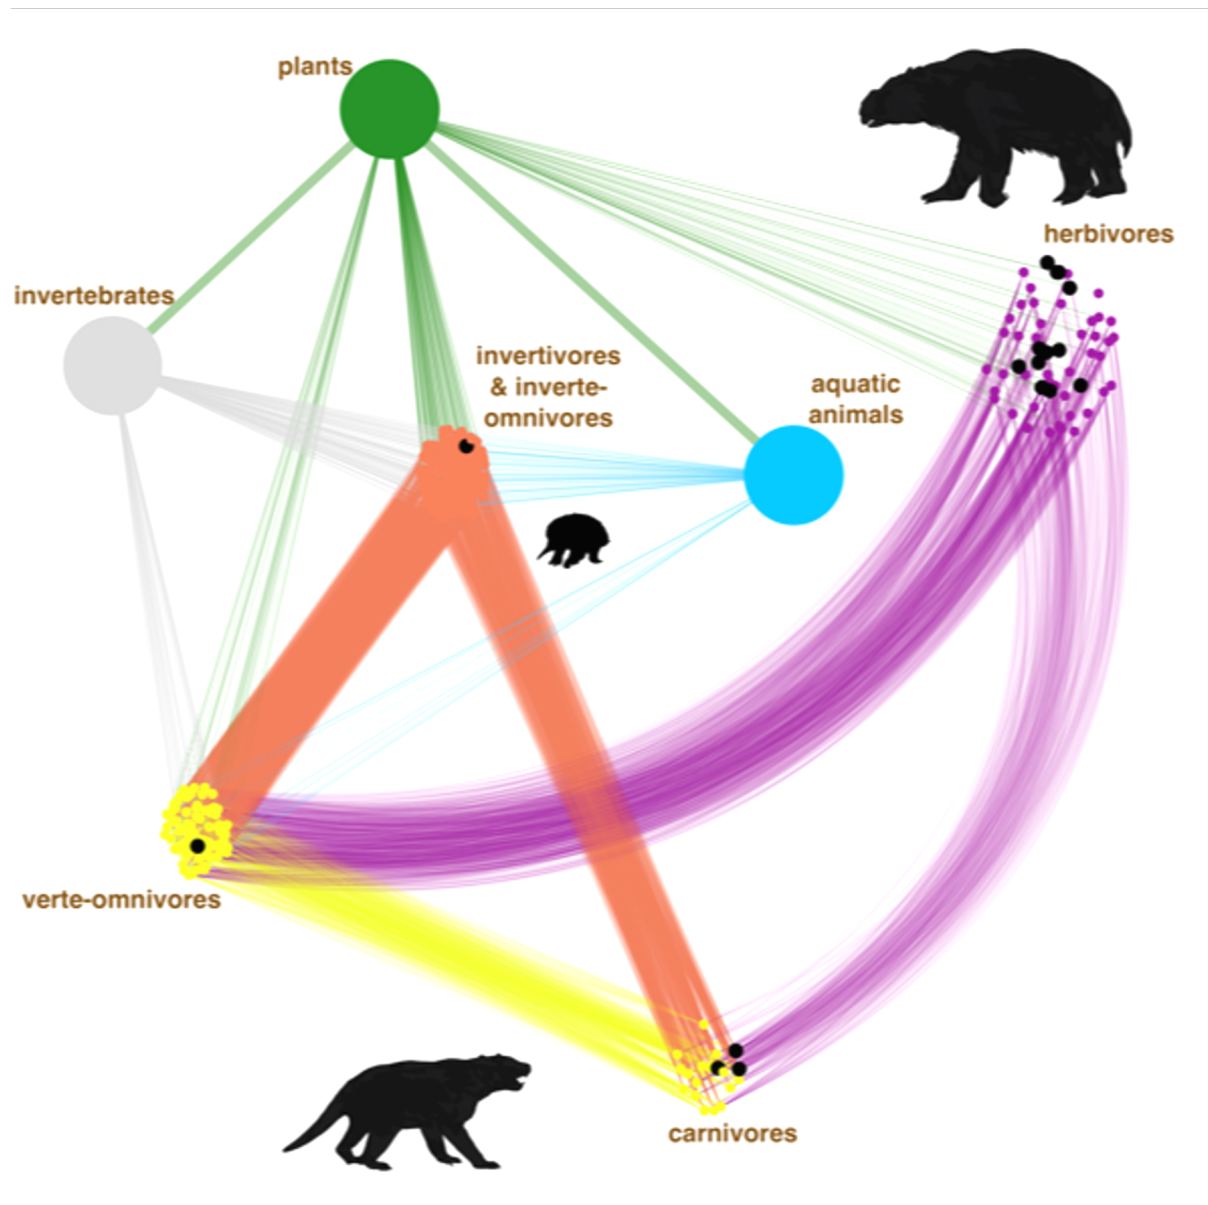

**Figure 2.** Example of an inferred ecological network model of the Late Pleistocene Naracoorte assemblage. Small points represent vertebrate species (nodes) and lines represent trophic interactions (links). Point colour shows trophic group (e.g., herbivores, carnivores etc), and extinct nodes are black. Due to uncertainty regarding trophic interactions, 1000 versions/models of the Naracoorte network were inferred and analysed. Plants, invertebrates and fish are shown as single large points in this figure.

**Figure 3**

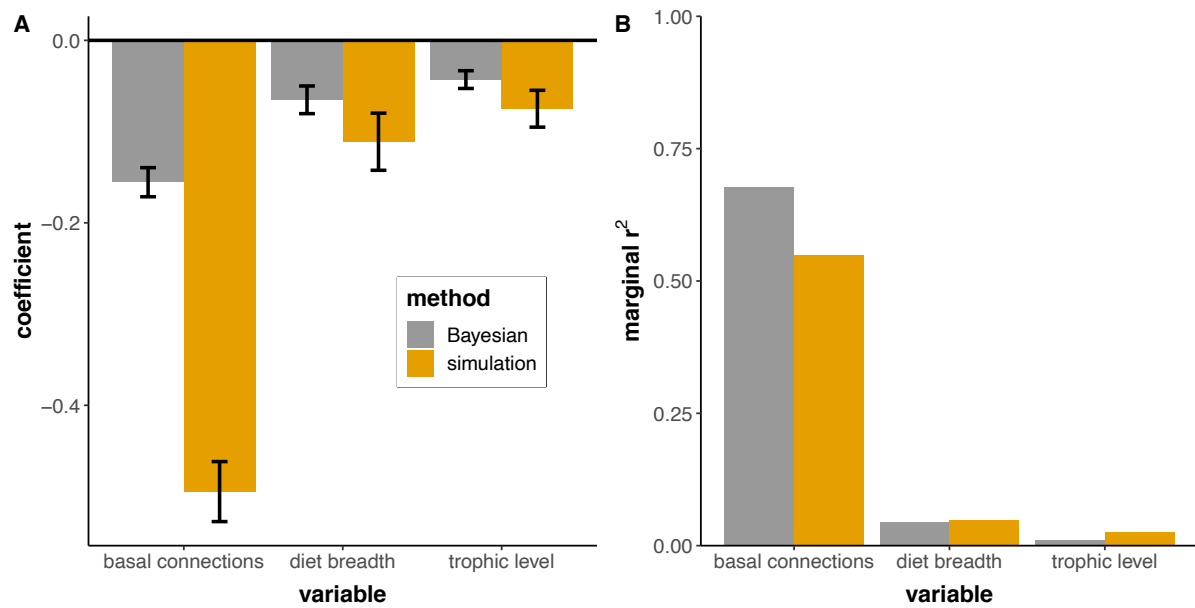

**Figure 3.** The effects of basal connections, diet breadth, and trophic level on vulnerability to bottom-up cascades in synthetic networks. Vulnerabilities were calculated using either a simulation or Bayesian network approach. Plot **A** shows the weighted, model-averaged coefficients of the main effects (both methods), and plot **B** shows the marginal  $R^2$  from mixed-effects models that had either basal connections, diet breadth, or trophic level as the only fixed effect (both methods). Error bars in plot A indicate 95% confidence intervals.

**Figure 4**

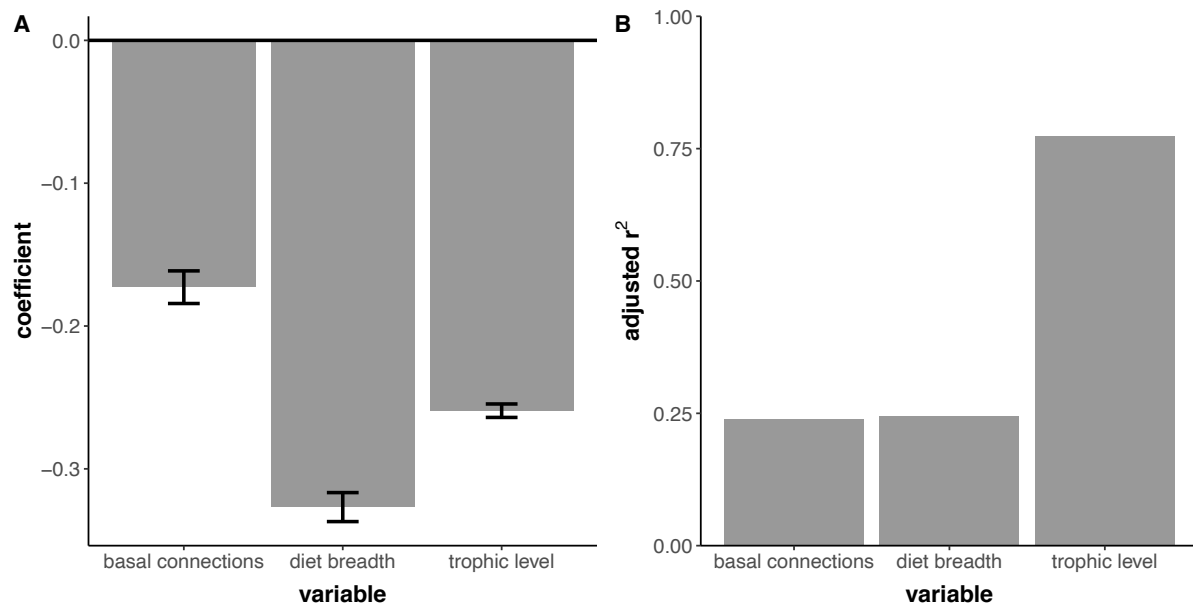

**Figure 4.** The effects of basal connections, diet breadth, and trophic level on vulnerability (calculated using the simulation approach) to bottom-up cascades in the Naracoorte network models. Each species' mean number of basal connections, diet breadth, trophic level, and vulnerability to bottom-up cascades was calculated, and linear regression models were fit to the mean data. Plot **A** shows the weighted, model-averaged coefficients of the main effects, and plot **B** shows the adjusted  $R^2$  from linear regression models that had either basal connections, diet breadth, or trophic level as the only fixed effect. Error bars in plot A indicate 95% confidence intervals.

**Figure 5**

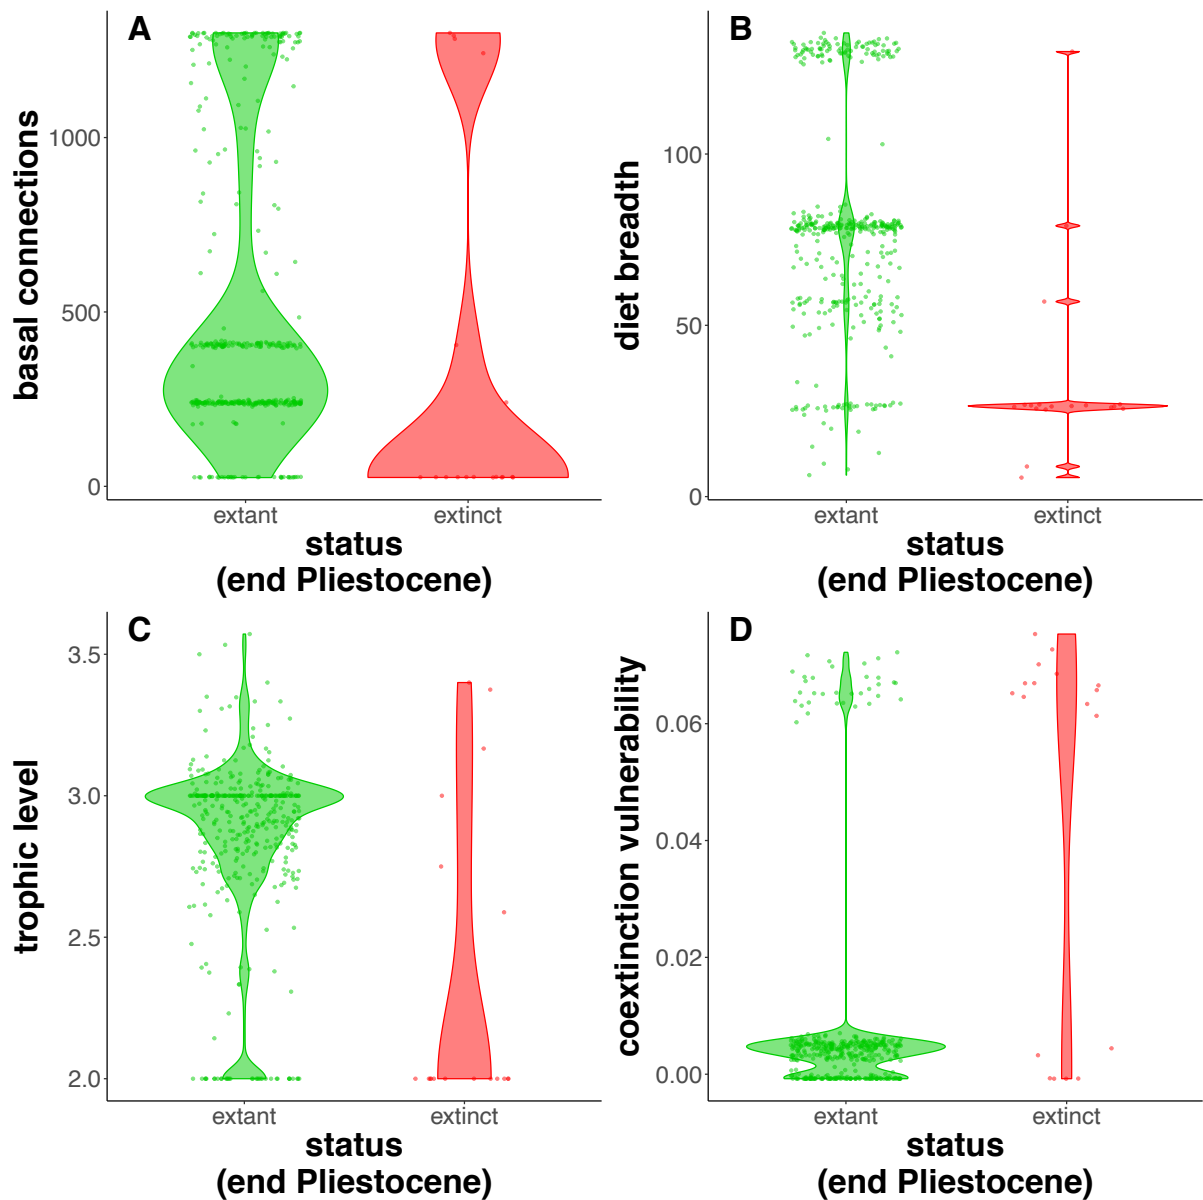

**Figure 5.** Comparison of species that survived into the Holocene (extant, shown in green) to those that went extinct in the Late Pleistocene (extinct, shown in red) from the Naracoorte network. Panel **A** shows the number of basal nodes (plants) connected directly and indirectly to each node via 'in' links; panel **B** shows diet breadth of each node; panel **C** indicates trophic level; and panel **D** shows the calculated coextinction vulnerability. The panels, which all include density violin plots and scatterplots, are based on each species' mean score across the 1000 Naracoorte network models.

**Figure 6**

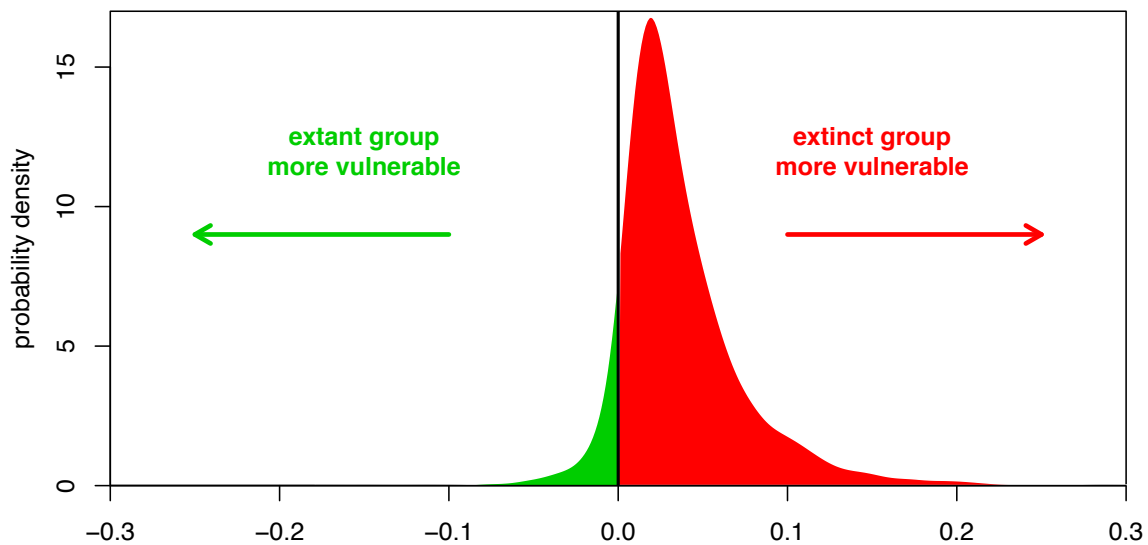

**Figure 6.** Density plot showing results from a randomization test (20,000 replicates) comparing bottom-up coextinction vulnerability of extinct *versus* extant species from the Naracoorte network models. Each species' coextinction vulnerability was calculated using the simulation method (removing plant nodes and then removing animal nodes that no longer had connections to plant nodes). From these results, the coextinction vulnerabilities of 10 extinct and 10 extant species were sampled (with replacement), and the mean differences in coextinction between the groups calculated. This process was repeated 20 times for the results from each of the 1000 network models and used to build the density plot. The red area of the density plot indicates higher vulnerability for extinct species, and the green area indicates higher vulnerability for extant species.



**Figure 7**

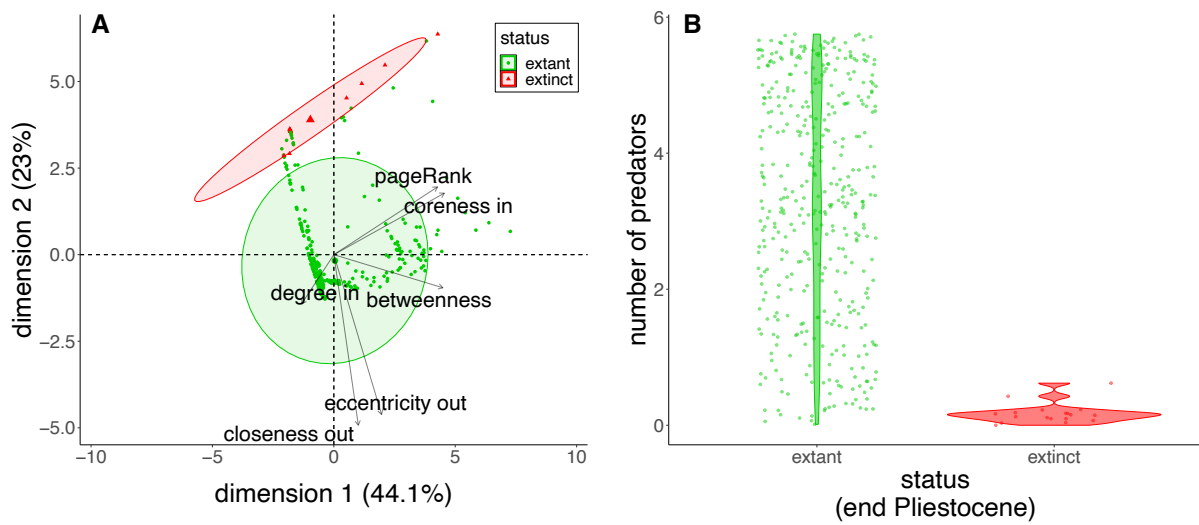

**Figure 7.** Comparison of extinct *versus* extant species in terms of their position in the Naracoorte trophic network. Panel **A** is a biplot of the first two principal components from a principal component analysis of six variables describing species' positions in the network. Panel **B** is a violin and scatter plot showing the number of species that preyed on each extant *versus* extinct species. We inferred 1000 models of the Naracoorte network, and from these models calculated each species' mean value of each metric for use in the principal-components biplot and predator-diversity plot.
